1 **First evidence of virus-like particles in the bacterial symbionts of**  
2 **Bryozoa**

3

4

5 Vishnyakov A.E.,<sup>1</sup> Karagodina N.P.,<sup>1</sup> Lim-Fong G.,<sup>2</sup> Ivanov P.A.<sup>3</sup>, Schwaha T.F.,<sup>4</sup>

6 Letarov A.V.,<sup>3\*</sup> Ostrovsky A.N.<sup>1,5\*</sup>

7

8 <sup>1</sup> Department of Invertebrate Zoology, Faculty of Biology, Saint Petersburg State

9 University, Universitetskaja nab. 7/9, 199034, Saint Petersburg, Russia

10 <sup>2</sup> Department of Biology, Randolph-Macon College, 304 Caroline Street, Ashland,

11 Virginia, USA

12 <sup>3</sup> Winogradsky Institute of Microbiology, Research Centre of Biotechnology, Russian

13 Academy of Sciences, pr. 60-letiya Oktyabrya 7 bld. 2, 117312 Moscow, Russia

14 <sup>4</sup> Department of Evolutionary Biology, Faculty of Life Sciences, University of Vienna,

15 Althanstrasse 14, 1090, Vienna, Austria

16 <sup>5</sup> Department of Palaeontology, Faculty of Earth Sciences, Geography and Astronomy,

17 Geozentrum, University of Vienna, Althanstrasse 14, 1090, Vienna, Austria

18

19 \* Corresponding authors: [a.ostrovsky@spbu.ru](mailto:a.ostrovsky@spbu.ru), [letarov@gmail.com](mailto:letarov@gmail.com)

20

21

22

23 **ABSTRACT**

24 Bacteriophage communities associated with humans and vertebrate animals have been

25 extensively studied, but the data on phages living in invertebrates remain scarce. In

26 fact, they have never been reported for most animal phyla. Our ultrastructural study

27 showed for the first time a variety of virus-like particles (VLPs) and supposed virus-  
28 related structures inside symbiotic bacteria in two marine species from the phylum  
29 Bryozoa, the cheilostomes *Bugula neritina* and *Paralicornia sinuosa*. We also  
30 documented the effect of VLPs on bacterial hosts: we explain different bacterial  
31 ‘ultrastructural types’ detected in bryozoan tissues as stages in the gradual destruction  
32 of prokaryotic cells caused by viral multiplication during the lytic cycle. We speculate  
33 that viruses destroying bacteria regulate symbiont numbers in the bryozoan hosts, a  
34 phenomenon known in some insects. We develop two hypotheses explaining exo- and  
35 endogenous circulation of the viruses during the life-cycle of *B. neritina*. Finally, we  
36 compare unusual ‘sea-urchin’-like structures found in the collapsed bacteria in *P.*  
37 *sinuosa* with so-called metamorphosis associated complexes (MACs) known to trigger  
38 larval metamorphosis in a polychaete worm.

39

#### 40 **Importance**

41 Complex symbiotic systems, including metazoan hosts, their bacterial symbionts and  
42 bacteriophages are widely studied using vertebrate models whereas much less is  
43 known about invertebrates. Our ultrastructural research revealed replication of the  
44 viruses and/or activation of virus related elements in the bacterial symbionts inhabiting  
45 tissues of the marine colonial invertebrates (phylum Bryozoa). The virus activity in the  
46 bacterial cells that are believed to be transmitted exclusively vertically is of a special  
47 importance. In addition, in the bacterial symbionts of one of the bryozoan hosts we  
48 observed the massive replication of the structures seemingly related to the  
49 Metamorphosis associated complexes (MAC). To our knowledge, MACs were never  
50 reported in the animal prokaryotic symbionts. Our findings indicate that Bryozoa may be  
51 new suitable model to study the role of bacteriophages and phage-related structures in  
52 the complex symbiotic systems hosted by marine invertebrates.

## 53 INTRODUCTION

54 Viruses are found in all kingdoms of living organisms and are best studied in those that  
55 have an applied or medical value (Ohmann & Babiuk 1986; Woolhouse et al. 2012;  
56 Johnson et al. 2015; Glennon et al. 2018; <https://talk.ictvonline.org/taxonomy/>). In  
57 addition to harboring the viruses replicating in eukaryotic cells, all known animals (as  
58 well as other multicellular organisms) are associated with specific microbial  
59 communities that include viruses infecting their symbiotic microorganisms. Most of  
60 these viruses are bacteriophages. Although the bacteriophage communities (viromes) of  
61 vertebrates are much better studied (reviewed in Letarov and Kulikov 2009; Shkoporov  
62 2019; Kwok et al. 2020), some data are also available for invertebrates. These include  
63 the viral communities associated with the cnidarian *Hydra* (Grasis et al. 2014; Bosch et  
64 al. 2015) and certain scleractinian corals (Weynberg et al. 2017; Mahmoud and Jose  
65 2017), which have been recently characterized using metagenomic methods. These  
66 studies showed that such communities are species-specific and may be significant for  
67 homeostasis of the animal hosts.

68 In addition to the complex microbiomes associated with invertebrate digestive  
69 systems or body surfaces, some species harbor specific bacterial symbionts that may  
70 be vertically transmitted. Although such symbionts are either intracellular or live in the  
71 host tissues (sometimes in special organs), they can also harbor bacteriophages. The  
72 best-known example is *Wolbachia* bacteriophage WO. The symbiotic bacteria  
73 *Wolbachia* exert a major influence on their arthropod hosts by manipulating their  
74 reproduction and providing increased resistance to infections (López-Madrugal and  
75 Duarte 2019). In turn, the bacteriophage WO influences the bacterial titer in the host  
76 tissues (Bordenstein et al. 2006). This phage also encodes proteins important for  
77 bacterium interactions with the host (Perlmutter et al. 2019).

78           In the marine realm, the large variety of viruses are found across diverse taxa,  
79 including protists and various invertebrates such as sponges, cnidarians, flatworms,  
80 polychaetes, mollusks, crustaceans and echinoderms (reviewed in Johnson 1984;  
81 Weinbauer 2004; Munn 2006; Lang et al. 2009; Rosario et al. 2015; see also Reuter  
82 1975; Vijayan et al. 2005; Nobiron et al. 2008; Crespo-González et al. 2008; Marhaver  
83 et al. 2008; Claverie et al. 2009; Jackson et al. 2016 and references therein). Being  
84 present in large numbers in the seawater (Suttle 2005; Brum et al. 2013), viruses,  
85 among others, enter suspension-feeders (e.g. Middelboe & Brussaard 2017). Indeed, by  
86 filtering enormous volumes of water, sea sponges acquire viruses that infect their cells  
87 (Vacelet & Gallissian 1978; Luter et al. 2010; Pascelli et al. 2018) as well as their  
88 bacterial symbionts (Lohr et al. 2005). Corals, together with their eukaryotic and  
89 prokaryotic symbionts, harbor a variety of viruses too (e.g. Lohr et al. 2007; Patten et al.  
90 2008; van Oppen et al. 2009; Vega Thurber & Correa 2011; Leruste et al. 2012; Pollock  
91 et al. 2014; Correa et al. 2016). Similarly, filter-feeders such as bivalve mollusks and  
92 tunicates and bacteria living in them also acquire viruses (reviewed in Farley 1978;  
93 Elston 1997; Renault & Novoa 2004; Richards et al., 2019). Recently a bacteriophage  
94 was found to enhance the biofilm formation in the gut of an ascidian by interacting with  
95 its bacterial hosts (Leigh et al. 2017).

96           The phylum Bryozoa is comprised of active filterers that feed mainly on  
97 microscopic algae, gathering them out of seawater (Winston 1977, 1978; Shunatova &  
98 Ostrovsky 2001, 2002; Schwaha et al. 2020). Together with sponges and cnidarians this  
99 group of colonial invertebrates is among the dominating foulers in many bottom  
100 communities from the intertidal zone to a depth of 8 km (Ryland 1970, 2005; McKinney  
101 & Jackson 1989; Nielsen 2013). Although viruses were never reported from bryozoans  
102 before, symbiotic associations with bacteria are known in species from several families  
103 of the order Cheilostomata, the largest bryozoan group (e.g. Lutaud 1965, 1969, 1986;

104 Woollacott & Zimmer 1975; Dyrinda & King 1982; Moosbrugger et al. 2012; Mathew et  
105 al. 2018, reviewed in Karagodina et al. 2018). The symbionts are vertically transmitted  
106 via the larval stage (Woollacott 1981; Zimmer & Woollacott 1983, 1989; Boyle et al.  
107 1987; Lim & Haygood 2004; Sharp et al. 2007a; Lim-Fong et al. 2008, and references  
108 therein). During our ongoing research we discovered presumed virus-like particles and  
109 virus-related structures associated with bacteria in two bryozoan species from two  
110 different families and distant localities. This paper presents the first description of the  
111 VLP (supposedly bacteriophages) in Bryozoa and their presumed effect onto their  
112 bacterial hosts. We also discuss the possible ways of the virus transmission and  
113 circulation and their role in these symbiotic systems.

114

## 115 **MATERIALS AND METHODS**

116

### 117 **Animal material collection, fixation and microscopy**

118 Colonies of the cheilostome bryozoan *Bugula neritina* (Linnaeus, 1758) (Bugulidae)  
119 (Fig. 1A) were collected intertidally on Atlantic Beach, Jaycee Park, Morehead City,  
120 North Carolina, USA, in spring 2011. *Paralicornia sinuosa* (Canu and Bassler, 1927)  
121 (Candidae) (Fig. 1B) was collected by SCUBA-diving in the vicinity of the Lizard Island  
122 Research Station, Great Barrier Reef, Coral Sea, Australia, on 4, 5 and 10 October  
123 2012 between 6 and 12 m depth.

124 Colony fragments were fixed in 2.5% glutaraldehyde (buffered in 0.1M Na-  
125 cacodylate containing 10% sucrose (pH 7.4)). They were postfixed with a 1 % solution  
126 of osmium tetroxide (OsO<sub>4</sub>). Decalcification was conducted for 24 h in 2% aqueous  
127 solution of EDTA. After this step the fragments were dehydrated in a graded ethanol  
128 series (30-50-70-80-90-100%), embedded in epoxy resin type TAAB 812 and sectioned  
129 (70 nm thick) using a Leica EM UC7 microtome (Leica Microsystems, Wetzlar,

130 Germany). To find the area for transmission electron microscopy (TEM), the  
131 histological sections (1.0  $\mu\text{m}$  thick) were prepared for light microscopy and stained with  
132 Richardson's stain using standard methods (Richardson et al. 1960). We sectioned  
133 seven branches of *B. neritina* and four branches of *P. sinuosa*. Ultrathin sections were  
134 picked up with single slot copper grids with formvar support film and contrasted with  
135 uranyl acetate and lead citrate. Semithin sections were analyzed using an  
136 Axiolmager.A1, Zeiss microscope (Zeiss, Oberkochen, Germany). Ultrathin sections  
137 were examined with a Jeol JEM-1400 microscope (JEOL Ltd., Japan).  
138

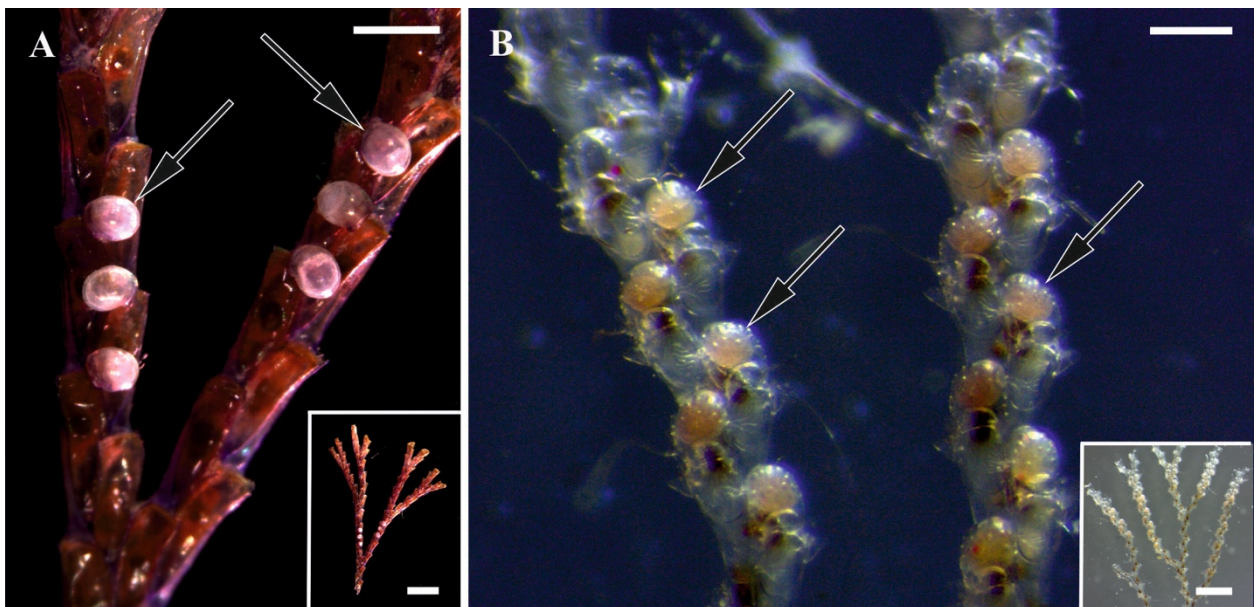

139

140

141 Fig. 1. General view of colony branches of (A, insert) *Bugula neritina* and (B, insert)  
142 *Paralicornia sinuosa*. Arrows: brood chambers (ovicells) with embryos.

143 Stereomicroscope. Scale bars: A, 500  $\mu\text{m}$ , insert, 2 mm; B, 200  $\mu\text{m}$ , insert, 1 mm.

144

#### 145 **Bacterial and bacteriophage strains and their cultivation**

146 To compare the objects found in the bacterial symbionts of *Bugula neritina* and  
147 reminiscent the VLPs, we prepared a suspension of *Escherichia coli* cells infected by

148 bacteriophage RB49 (a T4-related virus) and visualized them using the same fixative  
149 and following the same procedure as used for bryozoan samples.

150 *E. coli* C600 strain and bacteriophage RB49 were from the collection of the  
151 Laboratory of Microbial Viruses, Winogradsky Institute of Microbiology. For the infection  
152 experiment the overnight culture of *E. coli* F5 (10.1007/s00705-019-04371-1) was  
153 grown in LB medium at 37°C with agitation. The culture was diluted 100-fold with the  
154 same medium and cultured under the same conditions up to OD<sub>600</sub> 0.3. This optical  
155 density corresponds to 2x10<sup>7</sup> c.f.u. ml<sup>-1</sup>. Phage RB49 lysate was added to 3 ml of the  
156 bacterial culture up to the multiplicity of infection of 5. The culture was further incubated  
157 15 min and then the cells from 1 ml of the infected culture were spun down in the table-  
158 top centrifuge at 10 000 g for 40 seconds. The supernatant was removed and 200 µl of  
159 the same fixative solution that was used for the animal material was added, and the  
160 samples were then processed for thin sectioning and TEM study following the same  
161 protocol.

162

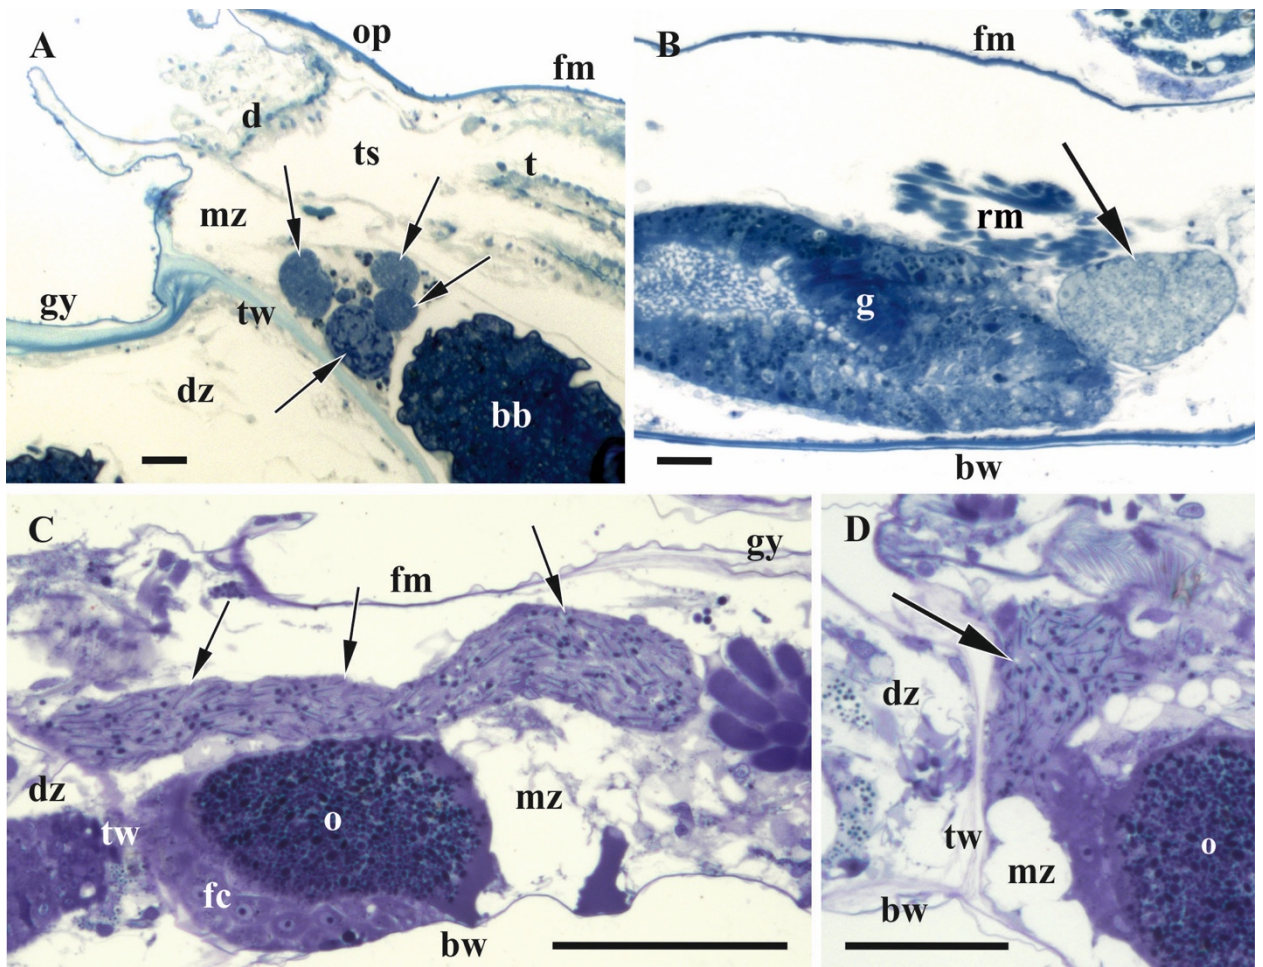

163

164

165 Fig. 2. Histological sections of autozooids of (A, B) *Bugula neritina* and (C, D)  
166 *Paralicornia sinuosa* containing bacteria inside funicular bodies (A, B) or funicular cords  
167 (C, D) (shown by arrows). Paracrystalline structures are visible as black 'dots' and 'lines'  
168 inside funicular cords in C and D. Light microscopy. Abbreviations: bb, brown body  
169 (degenerated polypide); bw, basal wall; d, diaphragm; dz, distal zoid; fc, follicle cells;  
170 fm, frontal membrane; g, gut; gy, gymnocyst; mz, maternal zoid; o, oocyte inside  
171 ovary; op, operculum; rm, retractor muscles; t, tentacles of retracted polypide; ts,  
172 tentacle sheath; tw, transverse wall. Scale bars: A, B, 20  $\mu$ m; C, 500  $\mu$ m; D, 300  $\mu$ m.

173

174

175 **RESULTS**



176 Colonies of both studied species, *Bugula neritina* and *Paralicornia sinuosa*, are lightly  
177 calcified, erect and branched (Fig. 1). Histological sections and TEM study of colony  
178 fragments showed the presence of symbiotic bacteria in the funicular system in both  
179 species (Fig. 2). In *B. neritina* the densely packed bacterial cells were present in so-  
180 called 'funicular bodies', which are swollen areas of the transport funicular cords  
181 crossing the coelomic cavity of autozooids (Fig. 2A, B), and in *P. sinuosa* they were  
182 present inside the funicular cords themselves (Fig. 2C, D). Also, in *B. neritina*, bacteria  
183 were additionally recorded in and between the epidermal cells of the tentacles, in the  
184 cells of the body wall (epithelium of the introvert and peritoneal cells) and in the  
185 presumed amoebocytes situated on the epithelial lining of the oocial vesicle plugging  
186 an entrance to the brood chamber (ovicell). In both species we detected intact (non-  
187 modified) as well as morphologically altered bacterial cells.

188         Ultrastructural study of the bacterial symbionts in both bryozoan hosts showed  
189 the presence of objects resembling virus-like particles (VLP) and/or virus-related  
190 structures. Our interpretation of the discovered particles (see below) as VLPs was  
191 based on their size, morphological features and in their occurrence in/near structurally  
192 altered bacterial cells. Although the virions of bacteriophages are dimensionally and  
193 morphologically stable and uniform, both fixation and TEM observations potentially  
194 could generate a 'false' visual diversity since the capsids are sectioned at different  
195 levels and viewed at different angles, and the tails (if present) may be hidden.

196         Comparison of *E. coli* cells infected by the phage RB49 showed that the  
197 bacteriophage heads and proheads exhibited a significant degree of apparent  
198 morphological variation (Fig. 3) similar to VLPs observed in bryozoans (Figs. 4, 6–8).  
199 The tails of RB49 particles could not be reliably seen inside the infected bacterial cells.  
200

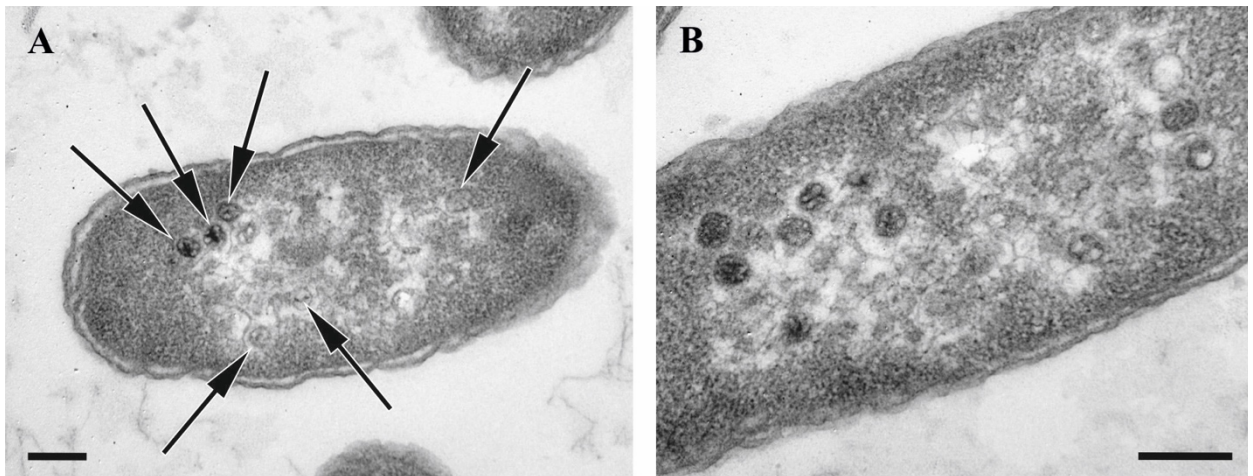

201

202

203 Fig. 3. Thin sections of *E. coli* F5 cells infected by the bacteriophage RB49 (15 min post  
204 infection). Bacteriophage heads and proheads (both empty and partially filled) are  
205 visible (arrows on A). Note that the capsids do not appear exactly uniform and the tails  
206 are not visible. TEM. Scale bars: A, B, 200 nm.

207

### 208 **VLPs in bacterial symbionts of *Bugula neritina***

209 In *B. neritina* the virus-like particles were found in the symbiotic bacteria associated with  
210 the tentacle epidermis (Figs. 4, 6, 7) and those located inside the funicular bodies (Figs.  
211 8, 9C, D, 10). In these two loci, bacteria were morphologically different, supposedly  
212 belonging to two different species. In both loci bacterial cells fall into three  
213 'ultrastructural types', presumably representing the successive stages of bacterial  
214 transformation/destruction during the viral lytic cycle. The VLPs became visible in the  
215 bacteria of 'types' II and III.

216

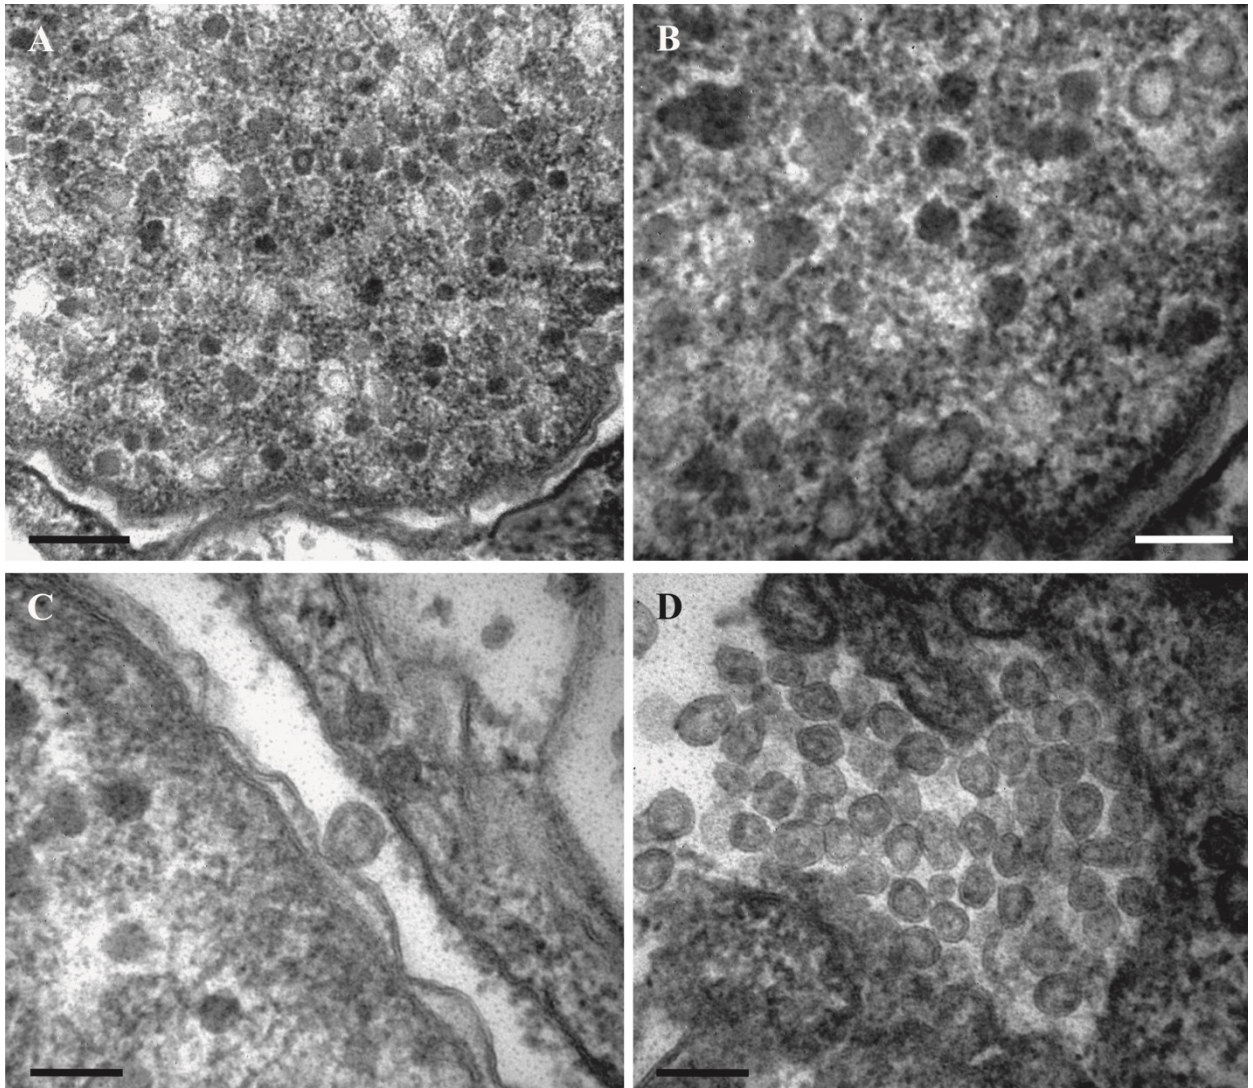

217

218

219 Fig. 4. Virus-like particles associated with symbiotic bacteria in the tentacles of *Bugula*  
220 *neritina*. A, B. Electron-dense and electron-translucent VLPs inside the cytoplasm of the  
221 bacterial cell. C. VLP inside (left) and on the surface of the bacterial host. D, virions  
222 outside bacteria in and between epithelial cells of a bryozoan. TEM. Scale bars: A, 200  
223 nm; B–D, 100 nm.

224

225

#### 226 *VLPs and bacteria in the tentacles*

227 The VLPs inside bacteria in the tentacle epidermal (ciliated) cells were predominantly  
228 oval and isometric, with diameters varying between 50 and 65 nm. Being either

229 electron-dense or translucent, their content probably reflects different virion assembly  
230 intermediates (Fig. 4A, B). Some VLPs with relatively translucent content were detected  
231 on the surface of bacterial cells (Fig. 4C) or between them and bryozoan epidermal  
232 cells. They were either oval or polygonal with clearly recognizable thick  
233 'cover'/peripheral layer (Fig. 4D).

234 Bacteria of 'type I' represent non-altered cells with an ultrastructure typical for  
235 Gram-negative bacteria. These were coccoid or slightly elongated cells (Figs. 5, 6A)  
236 with a diameter/length of about 0.5-0.7  $\mu\text{m}$ . A well-defined electron translucent nucleoid  
237 zone is surrounded by a thin peripheral layer of electron-dense cytoplasm enveloped by  
238 two membranes. Some of the cells were obviously dividing. Bacteria were recorded  
239 either directly in the cytoplasm or inside large vacuoles of the tentacle epidermal cells,  
240 individually or in groups. Some of them presumably occupied intercellular spaces. VLPs  
241 were not found inside or between the 'type I' bacterial cells.

242

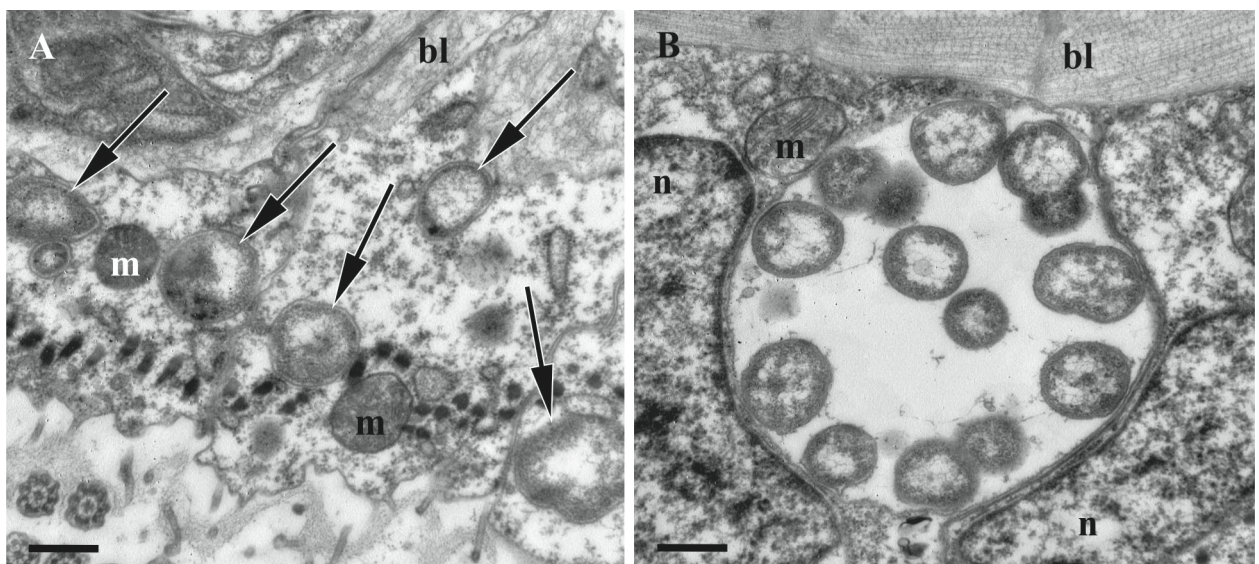

243

244

245 Fig. 5. Coccoid symbiotic bacteria of 'type I' inside the cytoplasm (A, arrows) and a  
246 large vacuole (B) in the ciliated cells of the tentacles of *Bugula neritina* (sectioned

247 kinetosomes and cilia are visible in the lower half of the image A). TEM.

248 Abbreviations: bl, basal lamina; m, mitochondria; n, nucleus. Scale bars: A, B, 500 nm.

249

250

251 'Type II' bacterial cells (presumably next stage of their transformation) were rod-

252 like and much larger than the coccoid form, reaching lengths of 4-5  $\mu\text{m}$  and diameters

253 of about 1.5  $\mu\text{m}$  (Fig. 6). The cytoplasm was granular and electron-dense most of the

254 volume, with the translucent nucleoid zone strongly reduced and fragmented. The cell

255 wall was wavy (Fig. 6A, B). Some of these bacteria showed the presence of scant VLPs

256 (Fig. 6C, D). The membranes of the vacuoles containing the 'type II' bacteria were often

257 not clearly recognizable, possibly destroyed (Fig. 6A, B).

258

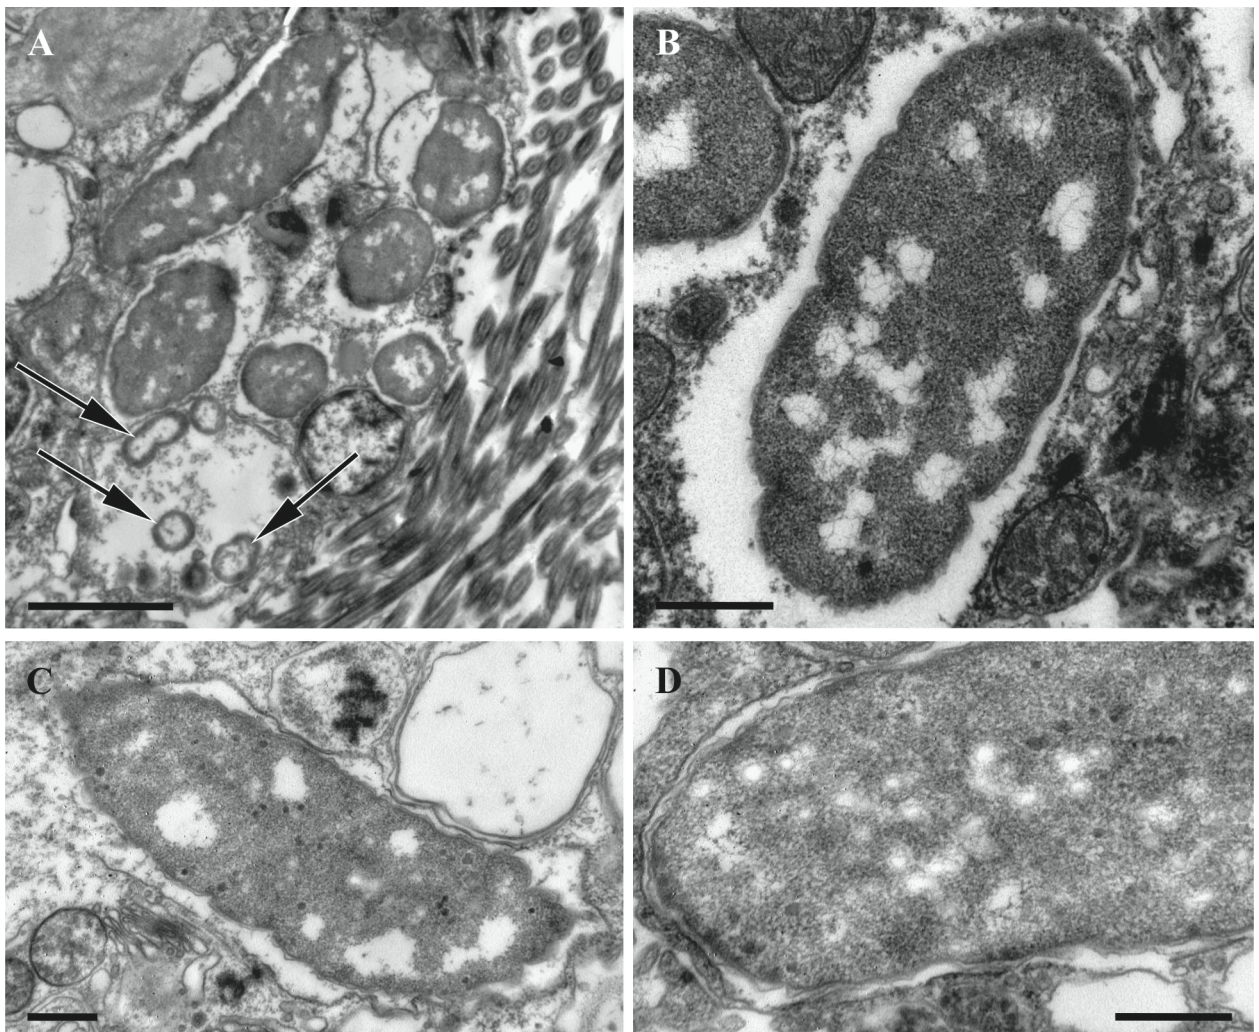

259

260

261 Fig. 6. Symbiotic bacteria of 'type I' and 'type II' inside ciliated cells of *Bugula neritina*  
262 tentacles. A, groups of smaller coccoid bacteria of 'type I' (arrows) and the larger rod-  
263 like 'type II'. B-D, 'type II' cells without (B) and with (C-D) few visible virus-like particles,  
264 both electron-dense and electron-translucent. TEM. Scale bars: A, 2  $\mu\text{m}$ ; B-D, 500 nm.

265

266 'Type III' bacteria were rod-like or ovoid. Their length was the same as in 'type II'  
267 cells, but the diameter increased up to 2-2.5 microns (Fig. 7). There were no traces of  
268 the nucleoid zone in 'type III' cells, and the cytoplasm was filled with abundant VLPs  
269 (Fig. 7).

270

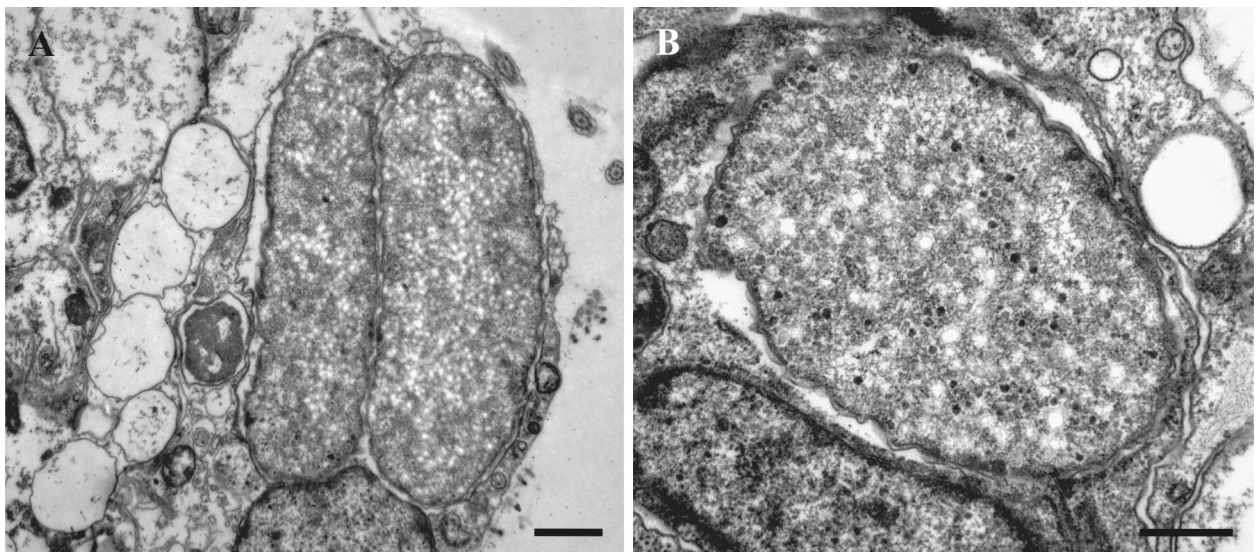

271

272

273 Fig. 7. Symbiotic bacteria of 'type III' inside epidermal cells of *Bugula neritina* tentacles.  
274 A, B, bacterial cells with their cytoplasm full of viral particles, both electron-dense and  
275 electron-translucent. TEM. Scale bars: A, 1  $\mu\text{m}$ ; B, 500 nm.

276

277

278 The 'type III' bacterial cells were usually detected closer to the apical parts of  
279 the tentacles, and their numbers were significantly lower than the number of intact  
280 coccoid bacteria ('type I') distributed through the entire tentacle length.

281

282

### 283 *VLPs and bacteria in the funicular bodies*

284 The VLPs associated with the bacteria filling the funicular bodies (swollen parts of the  
285 funicular system, Fig. 2A, B) of *B. neritina* were oval-polygonal, isometric, with a capsid  
286 diameter of 50-70 nm. Most virions were detected in the spaces between bacterial cells  
287 (Figs. 8B, C, 9D), but individual VLP were also visible in the cytoplasm of bacteria (Fig.  
288 8A).

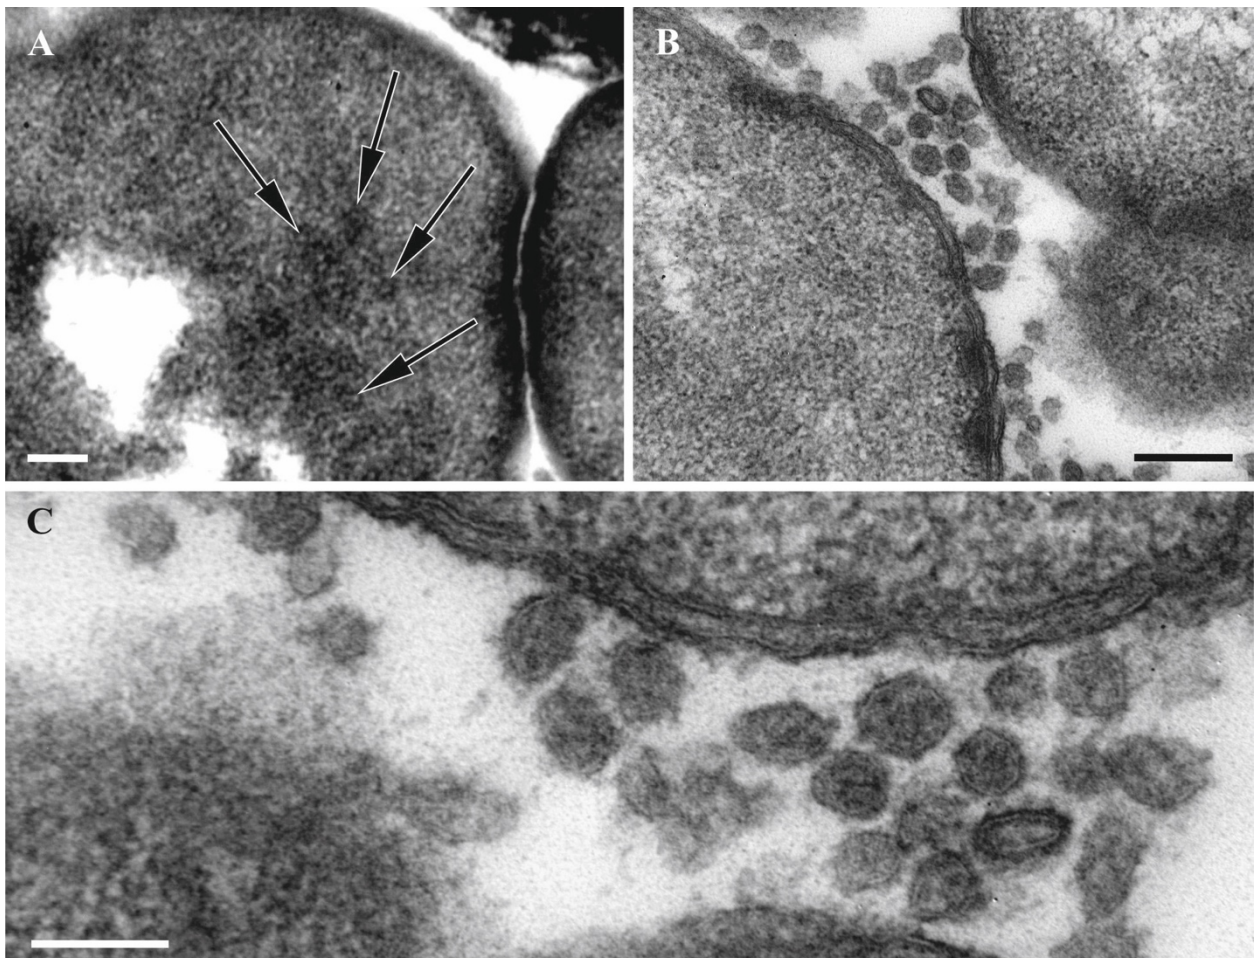

289

290

291 Fig. 8. Virus-like particles inside (arrows) (A) and outside (B, C) of symbiotic bacteria  
292 in the funicular bodies of *Bugula neritina*. A, bacteria of 'type II'. B, C, VLP between  
293 'type III' bacteria. TEM. Scale bars: A, 500 nm; B, 200 nm; C, 100 nm.

294

295

296 As was the case in the tentacles, the three bacterial 'ultrastructural types' (but of  
297 presumably different species, see above) were also detected inside autozooids. Intact  
298 Gram-negative bacterial symbionts ('type I') were found in the epithelial cells (in the  
299 cytoplasm and inside vacuoles) of the introvert – the flexible part of the body wall  
300 everting and inverting during the tentacle expansions and retractions (see above), in the  
301 peritoneal cells of the oocelial vesicle wall and in presumed amoebocytes (Fig. 9A, B),  
302 i.e. the outfold of the body wall plugging the entrance to the ovicell (brood chamber).  
303 They were rod-like (length 2.0-2.5  $\mu\text{m}$  and diameter 0.4  $\mu\text{m}$ ), had two outer membranes,  
304 a well-defined nucleoid zone and a thin layer of cytoplasm. They were present in groups  
305 in the cytoplasm as well as in the vacuoles. No VLPs were recognizable in them.

306



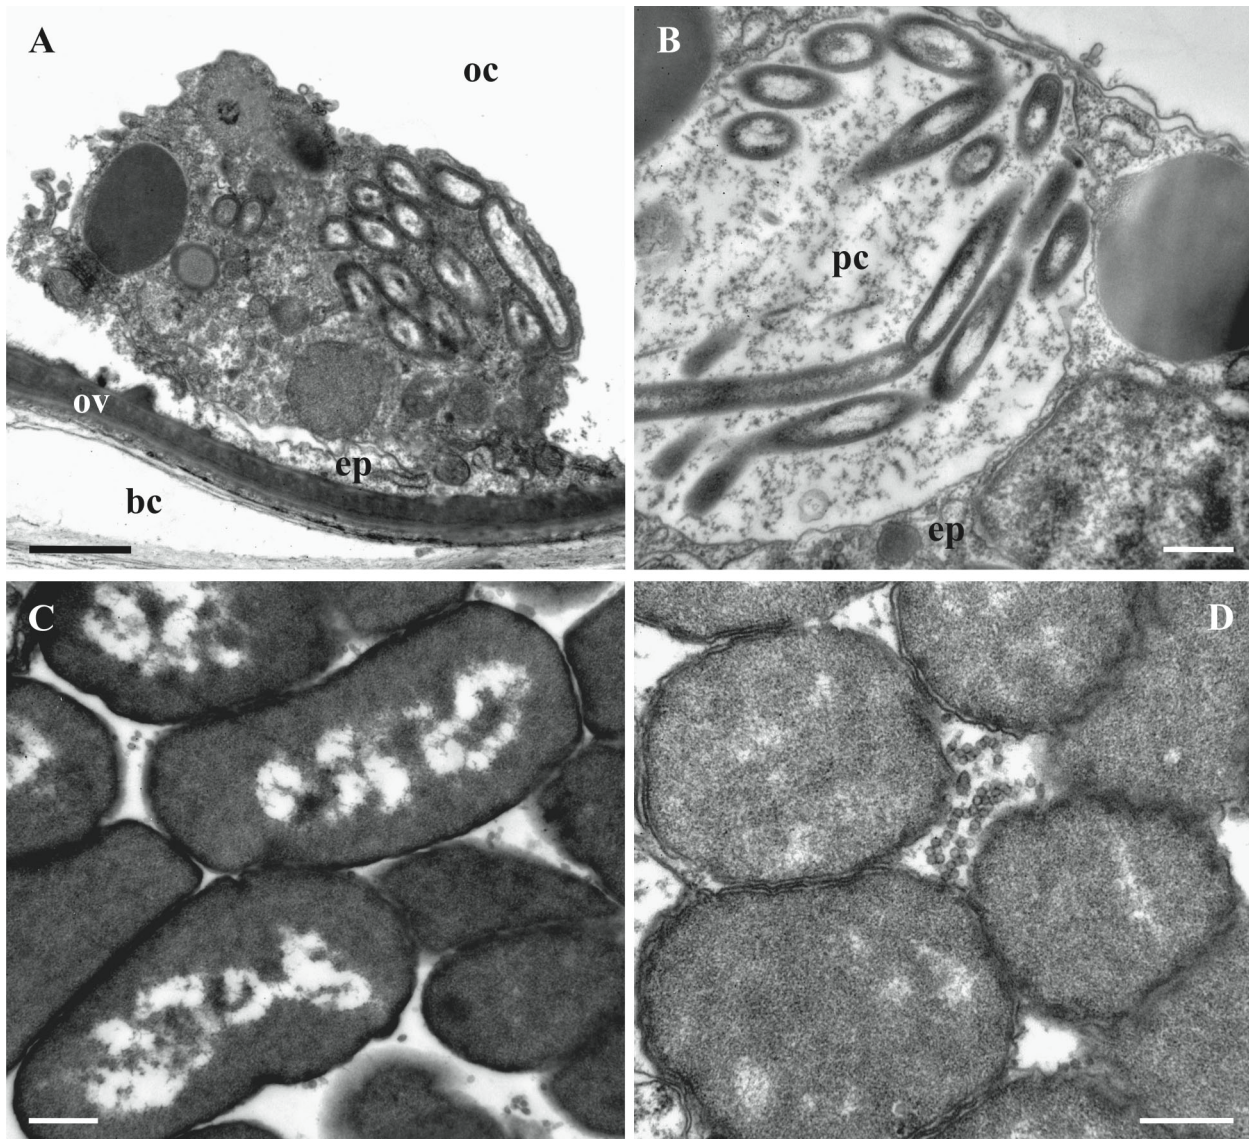

307

308

309 Fig. 9. Symbiotic bacteria inside autozooids of *Bugula neritina*. A, B, intact bacteria of  
310 'type I' in the cytoplasm of presumed amoebocyte (A) and peritoneal cell (B) of the body  
311 wall (oocial vesicle). C, D, bacteria in the funicular bodies: 'type II' (C) and 'type III' (D)  
312 with VLP visible in between bacterial cells. TEM. Abbreviations: bc, incubation space of  
313 brood chamber; ep, epithelial cell; oc, coelom of oocial vesicle; ov, wall of oocial  
314 vesicle; pc, peritoneal cell. Scale bars: A, 1  $\mu$ m; B-D, 500 nm.

315

316

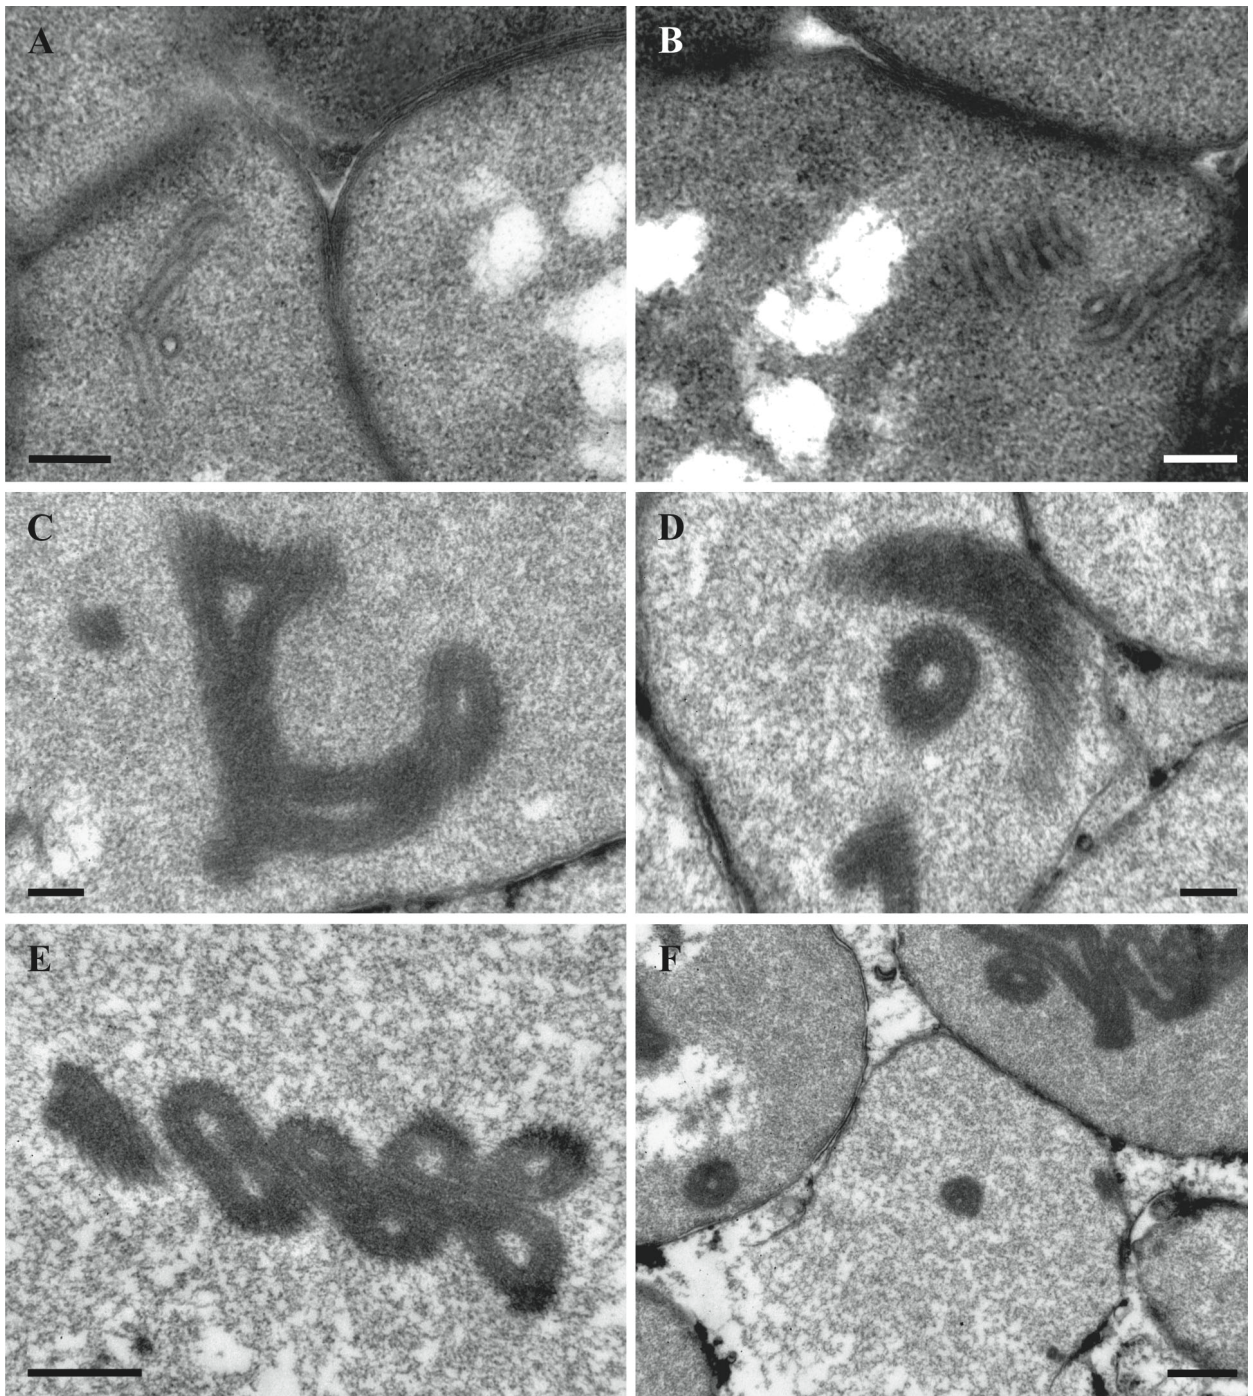

317

318

319 Fig. 10. 'Tube'-like structures in the bacterial cells found in the funicular bodies of  
320 *Bugula neritina*. A, B, bacteria of 'type II' with 'tube'-like structures in the beginning of  
321 their formation. C-F, fully-formed 'tube'-like structures in the bacteria of 'type III' and in  
322 destroyed bacteria (in F). TEM. Scale bars: A-D, 200 nm, E-F, 500 nm.

323

324

325           The ‘type II’ bacterial cells in the funicular bodies had a wide oval, often  
326 irregular shape (length up to 4.0-4.5  $\mu\text{m}$ , width up to 1.5-1.7  $\mu\text{m}$ ) (Figs. 8A, 9C, 10A, B).  
327 Their cytoplasm was electron-dense and their nucleoid was fragmented (Fig. 9C). In  
328 some of these bacterial cells, ‘tube’-like structures 40-50 nm thick were detected in the  
329 cytoplasm, being separated or assembled into groups (Fig. 10A, B). The walls of these  
330 ‘tubes’ were morphologically and dimensionally similar to the membranes of the  
331 bacterial cell wall. In some cases these ‘tubes’ and cell membranes were connected.

332           The shape and size of the ‘type III’ bacterial cells (Figs. 9D, 10C-F) were about  
333 the same as in ‘type II’. The cytoplasm was relatively translucent and mostly  
334 homogeneously flocculent. Some of the ‘type III’ bacteria showed two well-recognizable,  
335 albeit deformed, cell membranes (Figs. 8B, C, 9D). Some of them, similar to the ‘type II’  
336 bacteria (Fig. 10A, B), contained ‘tube’-like structures. In addition, only one cell  
337 membrane was often recognizable in the ‘type III’ bacteria that presumably were on the  
338 late stage of degradation (Fig. 10C-F). They contained large, twisted or curled electron-  
339 dense bodies with a spiral arrangement of parallel membranes. The bodies were up to  
340 several micrometers long, while their thicknesses varied, sometimes reaching 135 nm.  
341 The shape of these bodies strongly varied – we detected rings, U-shaped figures,  
342 complex multiple loops and other configurations. When the bacterial cells were  
343 destroyed, these bodies were released in the space between the bacteria.

344           Funicular bodies contained bacteria of either ‘type II’ or ‘type III’ separately, but  
345 the funicular bodies with different bacterial ‘types’ were detected in the same zooids.

346

347

#### 348 **Virus-related structures in bacterial symbionts of *Paralicornia sinuosa***

349 In *P. sinuosa* the cytoplasm of morphologically altered bacterial cells found in the  
350 funicular cords (Fig. 2 C,D) contained spherical particles consisting of the

351 cylindrical/tube-like elements evenly radiating from the central double-walled 'core'  
352 (Fig. 11). The diameter of these 'sea urchin'-shaped structures was about 300 nm, while  
353 the individual cylinders/tubes were about 120 nm long and about 20 nm thick. In cross-  
354 section the core with the bi-layered darker periphery (core wall?) and lighter central  
355 parts were recognizable at high magnification (Fig. 11B and insert). The cylinders/tubes  
356 were apparently interconnected by the electron-dense layer slightly below their distal  
357 tips. The proximal ends of the tubes also appear connected, forming a spherical  
358 'double-walled' core of the particle that has a diameter of 50-60 nm. In the medial  
359 sections of the particles about 20-21 cylinders/tubes are visible, leading to an estimated  
360 400-450 of them in one particle. The particle diameter seems to be stable/identical,  
361 suggesting that the size and/or the number of the cylinders/tube-like elements is tightly  
362 controlled during particle development.  
363

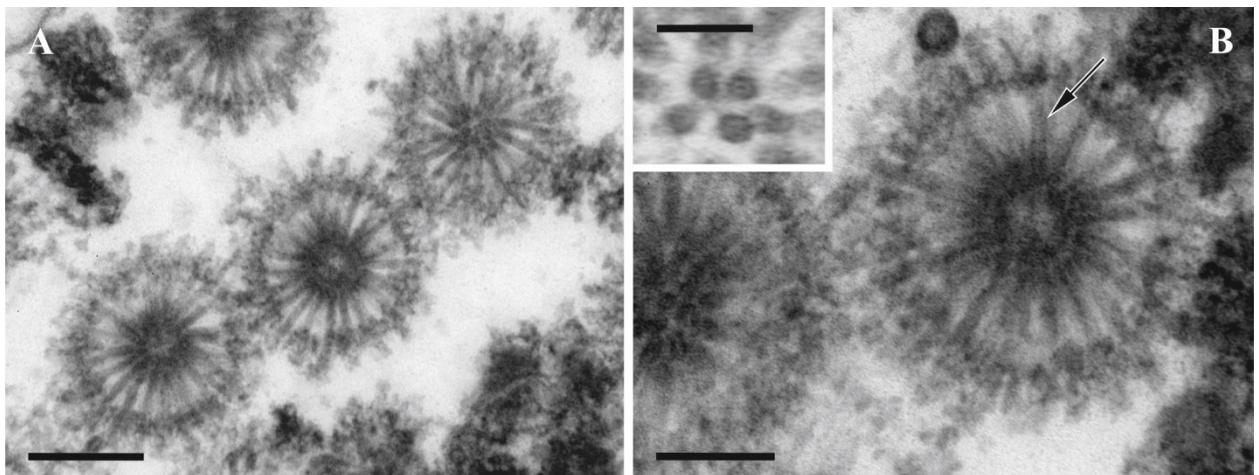

364

365

366 Fig. 11. A, B. Structures presumably derived from viruses in bacterial symbionts of  
367 *Paralicornia sinuosa*. Insert: cross-section of radial cylinders showing darker periphery  
368 and lighter central part (also shown by arrow in B) with a dark central 'spot'. TEM. Scale  
369 bars: A, 200 nm; B, 100 nm; insert, 50 nm.

370 Similar to *Bugula neritina*, closer examination of the morphology of bacterial  
371 cells also revealed three different 'ultrastructural types', which we again interpret as  
372 corresponding to the stages of the virus-like particle development before bacterial lysis.  
373 'Type I' – presumably intact or slightly altered Gram-negative bacteria. Such cells were  
374 rod-like, 3-4  $\mu\text{m}$  long and about 1  $\mu\text{m}$  wide (Fig. 12A, insert) The central part of the cell  
375 is occupied by filaments of nucleoid surrounded by an electron-translucent zone that  
376 often included electron-dense areas of various size and shape. The peripheral  
377 cytoplasm is electron-dense, granular, without inclusions, surrounded by a plasma  
378 membrane that was poorly recognizable in some cases.  
379

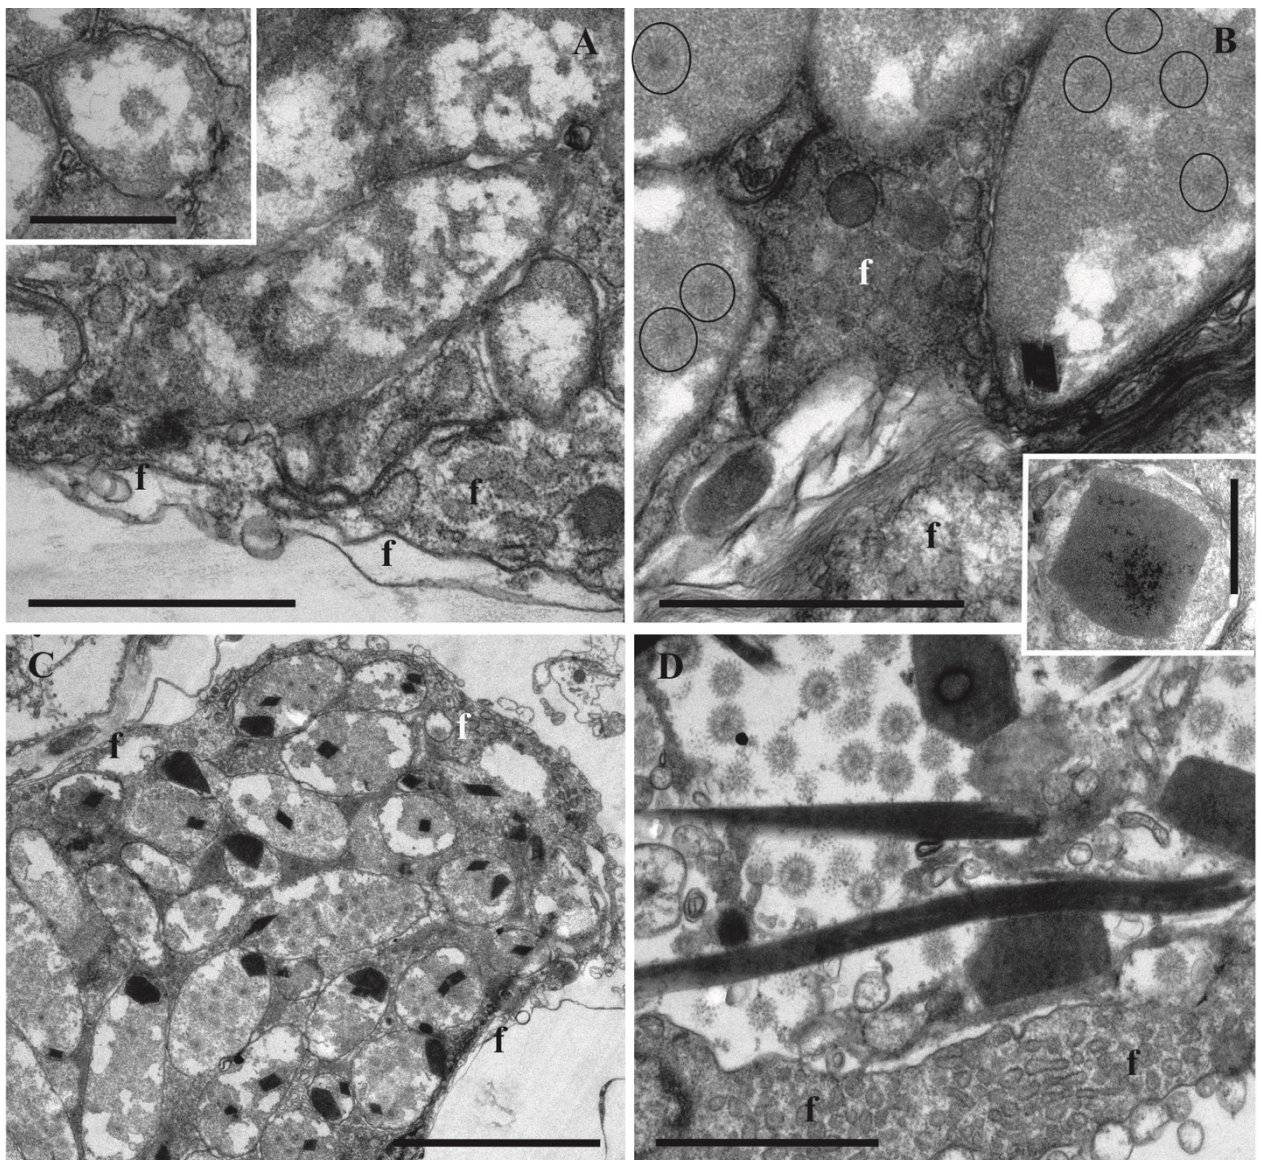

380

381

382 Fig. 12. Various stages in the lytic cycle of bacteriophages in the symbiotic bacteria of  
383 *Paralicornia sinuosa*. A and insert, longitudinal and cross-sections of non-/less altered  
384 bacteria ('type I' cells) inside funicular cord. B, VLP (in circles) becoming visible inside  
385 bacteria predominantly filled with electron-dense cytoplasm ('type II' cells), nucleoid is  
386 not recognizable; insert shows paracrystalline body at higher magnification. C, bacteria  
387 ('type III' cells) filled with viruses and paracrystalline structures. D, bacteriophages and  
388 paracrystals inside the cavity of the funicular cord after bacterial destruction. TEM.  
389 Abbreviations: f, cells of funicular cord. Scale bars: A, B, D, 2  $\mu\text{m}$ , inserts, 1  $\mu\text{m}$ ; C, 5  
390  $\mu\text{m}$ .

391

392 Bacterial cells of 'type II' presented moderate alterations in the cell ultrastructure  
393 presumably corresponding to the initial phase of VLP development. Cell length and  
394 width were increased, sometimes doubled (up to 8 and 2  $\mu\text{m}$ , respectively), and the cell  
395 wall often took on a wavy appearance. The nucleoid fibrils disappeared, and most of the  
396 cytoplasm became homogeneously electron-dense. The viral particles and  
397 paracrystalline structures became visible inside the bacteria (Fig. 12B). In 'type III' cells  
398 the VLPs filled most of the cell volume (Fig. 12C). The paracrystalline bodies became  
399 more numerous, acquiring very different shapes, from irregular polygons to long rods  
400 with a length of up to 8-10  $\mu\text{m}$  (Figs. 2C, D, 12C, D). At high magnification the densely  
401 packed parallel fibrils were visible in them (Fig. 12B, insert).

402

403 After destruction of bacteria, both the viral particles and paracrystals were freely  
404 distributed inside the cavity of the funicular cords. In some occasions we observed them  
405 in the zooidal coelom too, obviously following disintegration of the funicular cord wall.

406

406

## 407 **Discussion**

408 Detection of new viruses is often a serendipitous event during ultrastructural studies  
409 (e.g. Reuter 1975; Vacelet & Gallissian 1978; Crespo-González et al. 2008). In our case  
410 we found VLPs when studied of symbiotic associations of bacteria with an invertebrate.  
411 We explain the different bacterial ‘ultrastructural types’ detected in the tissues of two  
412 bryozoan species as stages in the gradual destruction of bacterial cells caused by the  
413 virus development.

414 The two variants of VLPs found in the symbiotic bacteria of *Bugula neritina*  
415 (compare Figs. 4 and 8) were similar to the capsids of tailed bacteriophages. No tails  
416 were observed, however. We suggest that the tail appendages are probably present but  
417 indiscernible in the TEM-images, as, for example, in the case of podoviruses with their  
418 short tails. Nonetheless, we cannot exclude that the VLPs belong to non-tailed phages  
419 that possess the virions of similar size such as, e.g. in the family Tectiviridae (Mäntynen  
420 et al. 2019).

421 Our observations indicate that the phages of symbiotic bacteria of *B. neritina* act  
422 as pathogenic agents, destroying bacteria in the course of their multiplication in the lytic  
423 cycle.

424 The situation observed in bacteria from the funicular system of *B. neritina* is  
425 special. We suggest that the ‘tubes’ visible in the cells of the second ‘morphotype’ are  
426 invaginations of membranes of the bacterial cell wall, and can later cluster as the  
427 bacteria are lysed, forming complex structures in the cytoplasm. Subsequently,  
428 elongation and spiral twisting of these ‘tubes’ could result in the formation of flexible  
429 ‘rods’. Further curling of these rods yields structures of various shapes. A similar effect  
430 is observed in the action of lactocins and of the viruses on Gram-positive bacteria of the  
431 genus *Lactobacillus* (Cuozzo et al. 2003; Chibani-Chennoufi et al. 2004).

432 Bacteria discovered in the tentacles and the funicular system of *B. neritina*  
433 have a different morphology (cocci vs rod-like), suggesting different (and  
434 independent) ways of their acquisition. The former potentially could penetrate into  
435 tentacle tissues directly from the surrounding water. This kind of interaction between  
436 bryozoan hosts, bacteria and phages might be common, but more extensive  
437 ultrastructural research on bryozoan tentacles is required to show whether this  
438 mechanism of infection is widespread. A supporting argument in this case is the  
439 discovery of similar symbionts and phage particles in the tentacles of *B. neritina*  
440 collected in the Mediterranean Sea on the coast of Spain (Vishnyakov, Schwaha, Souto,  
441 Ostrovsky, unpublished data).

442 The symbiotic bacteria occupying funicular bodies in the bryozoan zooidal cavity  
443 have been identified as *Candidatus Endobugula sertula* and are vertically transmitted  
444 through the larva and are thus inherited by the first zooid (ancestrula) during  
445 metamorphosis (Haygood & Davidson 1997; Sharp et al. 2007a). Zooidal budding then  
446 results in colony formation and the spread of the symbionts through it. Occupying the  
447 transport funicular system and utilizing the nutrients from it, the symbionts multiply,  
448 triggering the formation of the funicular bodies (Karagodina et al. 2018). Bacteria partly  
449 stay in these bodies and partly move to the oocial vesicle of the brood chamber by an  
450 unknown mechanism. Woollacott and Zimmer (1975) showed the presence of bacteria  
451 inside the lacunae of the funicular cords of this species, which could be the pathway for  
452 the symbionts traveling through zooids. Our data indicate an opportunity for bacterial  
453 transport to the oocial vesicle by amoebocytes, but more research is needed to  
454 evaluate this hypothesis.

455 The available data are insufficient to conclude whether the VLP production in  
456 symbiotic bacteria results from infection by externally acquired bacteriophage particles  
457 or is due to induction of the prophages or prophage-like elements present in the



458 genomes of these bacteria. The infection hypothesis seems more plausible for  
459 bacteria found in *B. neritina* tentacles, but the scenario potentially could be different in  
460 case of the funicular body symbionts. We suggest that in this species the phages  
461 circulate in the bryozoan host population together with bacteria by vertical transfer,  
462 which does not require repeated external infection. Those symbionts that remain in the  
463 funicular bodies finally collapse due to viral activity. In contrast, some bacteria move by  
464 an unknown mechanism from the funicular bodies towards the brood chamber  
465 containing phages in the form of prophages in the bacterial genome. We speculate that  
466 the superficially intact ‘type I’ bacteria we found in the peritoneal cells and presumed  
467 amoebocytes in the oocial vesicle are, in fact, infected with prophages. Similar  
468 aggregations of the “tiny dark granules” (possibly bacteria) were earlier described  
469 and/or illustrated inside or close to the oocial vesicle in *B. neritina* (Mathew et al. 2018,  
470 p. 8) and a related bryozoan species (Ostrovsky et al. 2009; Ostrovsky 2013a, b) using  
471 histological sections. The reconstructed draft genome of *Ca. E. sertula*, consisting of  
472 112 contigs, from a metagenomic assembly did not uncover any prophage-like elements  
473 (Miller et al 2016a); however, it is possible that such elements were absent in those  
474 particular specimens (one pooled collection of *B. neritina* larvae and several autozooids  
475 and ovicells of one *B. neritina* colony), or that these prophages were not recovered by  
476 the assembly algorithms. Interestingly, many short contigs (~2 kbp) were recovered  
477 from the metagenome (Miller et al 2016b), and some of these contigs might represent  
478 viral sequences.

479         The next step is a transfer of infected bacteria from the oocial vesicle through its  
480 wall to the brood cavity. Moosbrugger with co-authors (2012) showed the presence of  
481 bacteria inside an ovicell containing an embryo (see also Sharp et al. 2007a).  
482 Accordingly, if our model is correct, prophages are transferred to the brood chamber  
483 with their bacterial hosts finally reaching the larvae. This enables them to be transmitted

484 to the next bryozoan generation. Potentially, the phages and bacteria found in the  
485 tentacles might circulate in the host in a similar way, but it then remains unclear how  
486 they could reach larvae in the brood chamber. The only imaginable strategy is their  
487 transfer during oviposition when the tentacle crown delivers the zygote to the brood  
488 cavity (its mechanism reviewed in Ostrovsky & Porter 2011 and Ostrovsky 2013a). This  
489 way, however, appears less probable.

490         The induction hypothesis appears to be the only possibility to explain the  
491 formation of the structures observed in *Paralicornia sinuosa*. These structures do not  
492 resemble any known bacteriophages and appear to be too large to be interpreted as the  
493 virions of a novel bacteriophage family. At the same time the formation of these  
494 structures is clearly associated with cell destruction by lysis. We speculate that the  
495 particles observed in *P. sinuosa* symbionts are similar to the metamorphosis associated  
496 complexes (MAC) recently discovered in the free-living bacteria *Pseudomonas*  
497 *luteoviolaceae* (Shikuma et al. 2014). MACs are encoded by prophage-like elements in  
498 the *P. luteoviolacea* genome, and their formation is associated with host cell death and  
499 lysis. Structurally, MAC are an assemblage of multiple contractile systems related to the  
500 contractile tails of myoviruses (tailed bacteriophages with contractile tails) (reviewed by  
501 Leiman et al. 2009 and Taylor et al 2018). The tail-like structures in MAC are assembled  
502 in a sea urchin-like pattern that fills almost the entire host cell. The baseplates of the  
503 individual contractile systems point outwards and are interconnected by a network  
504 formed by the homologs of the tail fibers (Shikuma et al. 2014). Interestingly, the  
505 formation of MAC in *P. luteoviolacea* was associated with the formation of 2D  
506 paracrystalline arrays that were tentatively interpreted as the crystals of the sheath  
507 protein (Shikuma et al. 2014). In *P. sinuosa* bacterial cells, the sea-urchin like structures  
508 are also associated with large protein crystals (Fig. 12), adding to the similarity of these  
509 two systems. Although the formation of similar crystalline bodies was previously

510 reported in certain cells infected by viruses (Lawrence et al., 2014), the physiology of  
511 this process and the possible function of these structures are poorly understood.

512 The MACs of *P. luteoviolacea* function to deliver a protein signal into the cells of  
513 the larvae of the tubeworm *Hydroides elegans*. The delivery takes place when the larva  
514 contacts the biofilm containing the MACs. This causes the contraction of the tail-like  
515 structures and the penetration of the tail tube tips into the animal cells (Ericson et al.  
516 2019). The delivery of the protein signal induces larval metamorphosis (Shikuma et al.  
517 2014; Ericson et al. 2019). It is currently unclear whether bacteria can benefit from this  
518 effect.

519 The features of the structures that we detected in *P. sinuosa* symbionts are  
520 compatible with a presumed MAC-like nature. The length of their cylindrical elements is  
521 about 120 nm, i.e. comparable to the phage tail of the bacteriophage T4 contractile tail  
522 (114 nm long) (Ackermann 2009). Although no data are currently available on a  
523 potential involvement of MAC-related structures in interspecies communications  
524 between bacterial symbionts and their *P. sinuosa* host, it seems a plausible hypothesis.  
525 In this regard it is important that small (compared to *P. luteoviolaceae* MAC) particles  
526 released by the lysed symbiont cells inside bryozoan host may move from its funicular  
527 system to the zooidal coelomic cavity and further to the surrounding water via  
528 coelomopores (Ostrovsky & Porter 2011).

529 Interestingly, the onset of the MAC or VLP production appears to occur almost  
530 simultaneously in multiple bacterial cells within one funicular body (Figs. 9C, D, 12).  
531 This suggests the triggering of induction by some cue generated by bacteria or by the  
532 animal host.

533 We speculate that maintaining an excess of symbiotic bacteria in the funicular  
534 bodies becomes energetically disadvantageous at a certain point, and viruses  
535 destroying bacteria thus act as regulators of their numbers. Such phages are termed

536 mutualistic, and their participation in indirectly regulating the number of symbiotic  
537 bacteria and processes carried out by symbionts has been described for aphids and  
538 some other insects (Moran et al. 2005; Bordenstein et al. 2006; Weldon, Oliver, 2016).  
539 This relationship as also been assumed for the symbiotic associations of cnidarians with  
540 their microbial symbionts (Rohwer Thurber 2009; Roossinck 2011).

541 Our study is the first step towards future research on viruses of the bacterial  
542 symbionts of Bryozoa. The next step should include determination of the systematic  
543 status of both the viruses and their bacterial hosts. The wide range of bioactive  
544 substances identified from bryozoans (reviewed in Sharp et al. 2007b, see also  
545 Maltseva et al. 2016) suggests a wide distribution of symbionts inside these  
546 invertebrates. These symbionts, in turn, could host various viruses – but this research  
547 has just begun.

548

549

## 550 **ACKNOWLEDGEMENTS**

551 This study was performed using the laboratories and equipment of the Centre for  
552 Molecular and Cell Technologies, Saint Petersburg State University. Dr K. Tilbrook,  
553 Oxford University, kindly helped during collecting and identification of the Australian  
554 material. Drs A. Hoggett and L. Vail, Lizard Island Research Station, Australian  
555 Museum, kindly provided all the necessary help during field work on the Great Barrier  
556 Reef. We thank Dr M. Stachowitsch, University of Vienna, for linguistically revising the  
557 early draft of the manuscript. We are also deeply indebted to anonymous reviewers who  
558 helped to improve the manuscript. Planning of the research, TEM microscopy, data  
559 processing and analysis, and manuscript preparation were performed at the Saint  
560 Petersburg State University, being funded by the Russian Science Foundation (grant  
561 18-14-00086). The animal samples for microscopy were processed at the facilities of

562 the University of Vienna. The *E. coli* samples processing and a part of the data  
563 analysis were performed at the Winogradsky Institute of Microbiology, Research Centre  
564 “Biotechnology” of the Russian Academy of Sciences.

565

566

567 **COMPLIANCE WITH ETHICAL STANDARDS**

568

569 **CONFLICT OF INTERESTS:** The authors declare that they have no conflict of interest.

570

571 **ETHICAL APPROVAL:** No ethical issues were raised during our research.

572

573 **SAMPLING AND FIELD STUDIES:** No permits for sampling and field studies were  
574 required.

575

576

577 **REFERENCES**

578 Ackermann HW. 2009. Basic phage electron microscopy. *Methods Mol Biol* 501:113–  
579 126.

580

581 Bordenstein SR, Marshall ML, Fry AJ, Kim U, Wernegreen JJ. 2006. The tripartite  
582 associations between bacteriophage, *Wolbachia*, and arthropods. *PLoS Pathog* 2:e43.

583

584 Bosch TC, Grasis JA, Lachnit T. 2015 Microbial ecology in *Hydra*: Why viruses matter. *J*  
585 *Microbiol* 53:193–200.

586

- 587 Boyle PJ, Maki JS, Mitchell R. 1987. Mollicute identified in novel association with  
588 aquatic invertebrate. *Curr Microbiol* 15:85–89.
- 589
- 590 Brum JR, Schenck RO, Sullivan MB. 2013. Global morphological analysis of marine  
591 viruses shows minimal regional variation and dominance of non-tailed viruses. *The*  
592 *ISME J* 7:1738–1751.
- 593
- 594 Canu F, Bassler RS. 1927. Bryozoaires des îles Hawaiï. *Bul Soc Sci Seine-et-Oise*. 8:1–  
595 67.
- 596
- 597 Chibani-Chennoufi S, Bruttin A, Dillmann ML, Brüssow H. 2004. Phage-host interaction:  
598 An ecological perspective. *J Bacteriol* 186:3677–3686.
- 599
- 600 Claverie J-M, Grzela R, Lartigue A, Bernadac A, Nitsche S, Vacelet J, Ogata H, Abergel  
601 C. 2009. Mimivirus and Mimiviridae: Giant viruses with an increasing number of  
602 potential hosts, including corals and sponges. *J Invertebr Pathol* 101:172–180.
- 603
- 604 Correa AMS, Ainsworth TD, Rosales SM, Thurber AR, Butler CR, Vega Thurber RL.  
605 2016. Viral outbreak in corals associated with an in situ bleaching event: atypical  
606 herpes-like viruses and a new megavirus Infecting *Symbiodinium*. *Front Microbiol* 7:127.
- 607
- 608 Crespo-González C, Rodríguez-Domínguez H, Soto-Búa M, Segade P, Iglesias R,  
609 Arias-Fernández C, García-Estévez JM. 2008. Virus-like particles in *Urastoma cyprinae*,  
610 a turbellarian parasite of *Mytilus galloprovincialis*. *Dis Aquat Organ* 79:83–86.
- 611

- 612 Cuozzo SA, Castellano P, Sesma FJ, Vignolo GM, Raya RR. 2003. Differential roles  
613 of the two-component peptides of lactocin 705 in antimicrobial activity. *Curr Microbiol*  
614 46:180–183.
- 615
- 616 Dyrinda PEJ, King PE. 1982. Sexual reproduction in *Epistomia bursaria* (Bryozoa:  
617 Cheilostomata), an endozooidal brooder without polypide recycling. *J Zool* 198:337–  
618 352.
- 619
- 620 Elston RA. 1997. Bivalve mollusc viruses. *World J Microbiol Biotechnol* 13:393–403.
- 621
- 622 Ericson CF, Eisenstein F, Medeiros JM, Malter KE, Cavalcanti GS, Zeller RW, Newman  
623 DK, Pilhofer M, Shikuma NJ. 2019. A contractile injection system stimulates tubeworm  
624 metamorphosis by translocating a proteinaceous effector. *eLife* 8:e46845.
- 625
- 626 Farley CA. 1978. Viruses and viruslike lesions in marine mollusks. *Mar Fish Rev* 40:18–  
627 20.
- 628
- 629 Glennon EE, Restifa O, Sbarbaroa SR, Garniera R, Cunninghamb AA, Suu-Irec RD,  
630 Osei-Amponsahd R, Wooda JLN, Peele AJ. 2018. Domesticated animals as hosts of  
631 henipaviruses and filoviruses: A systematic review. *Veterinary J* 233:25–34.
- 632
- 633 Grasis JA, Lachnit T, Anton-Erxleben F, Lim YW, Schmieder R, Fraune S, Franzenburg  
634 S, Insua S, Machado G, Haynes M, Little M, Kimble R, Rosenstiel P, Rohwer FL, Bosch  
635 TC. 2014. Species-specific viromes in the ancestral holobiont *Hydra*. *PLoS One*  
636 9:e109952.
- 637

- 638 Haygood MG, Davidson SK. 1997. Small-subunit rRNA genes and in situ  
639 hybridization with oligonucleotides specific for the bacterial symbionts in the larvae of  
640 the bryozoan *Bugula neritina* and proposal of "*Candidatus* Endobugula sertula". Appl  
641 Environ Microbiol,63:4612–4616.
- 642
- 643 ICTV Taxonomy. <https://talk.ictvonline.org/taxonomy/> (downloaded on 20 January 2020)  
644
- 645 Jackson E. W., Bistolas K. S. I., Button J. B., Hewson I. 2016. Novel circular single-  
646 stranded DNA viruses among an asteroid, echinoid and holothurian (Phylum:  
647 Echinodermata). PLoS One 11:e0166093.
- 648
- 649 Johnson PT. 1984. Viral diseases of marine invertebrates. Helgolander Meeresunters  
650 37:65–98.
- 651
- 652 Johnson CK, Hitchens PL, Evans TS, Goldstein T, Thomas K, Clements A, Joly DO,  
653 Wolfe ND, Daszak P, Karesh WB, Mazet JK. 2015. Spillover and pandemic properties  
654 of zoonotic viruses with high host plasticity. Sci Rep 5:14830.
- 655
- 656 Karagodina NP, Vishnyakov AE, Kotenko ON, Maltseva AL, Ostrovsky AN. 2018.  
657 Ultrastructural evidence for nutritional relationships between a marine colonial  
658 invertebrate (Bryozoa) and its bacterial symbionts. Symbiosis 75:155–164.
- 659
- 660 Kwok KTT, Nieuwenhuijse DF, Phan MVT, Koopmans MPG. 2020. Virus metagenomics  
661 in farm animals: A Systematic Review. Viruses 12:E107.
- 662



- 663 Lang AS, Rise ML, Culley AI, Steward GF. 2009. RNA viruses in the sea. FEMS  
664 Microbiol Rev 33:295–323.  
665
- 666 Lawrence SA, Wilson WH, Davy JE, Davy SK. 2014. Latent virus-like infections are  
667 present in a diverse range of *Symbiodinium* spp. (Dinophyta). J Phycol 50:984–997.  
668
- 669 Leigh B, Karrer C, Cannon JP, Breitbart M, Dishaw LJ. 2017. Isolation and  
670 characterization of a *Shewanella* phage–host system from the gut of the tunicate, *Ciona*  
671 *intestinalis*. Viruses 9:E60.  
672
- 673 Leiman PG, Basler M, Ramagopal UA, Bonanno JB, Sauder JM, Pukatzki S, Burley SK,  
674 Almo SC, Mekalanos JJ. 2009. Type VI secretion apparatus and phage tail-associated  
675 protein complexes share a common evolutionary origin. Proc Nat Acad Sci 106:4154–  
676 4159.  
677
- 678 Leruste A, Bouvier T, Bettarel Y. 2012. Enumerating viruses in coral mucus. Appl  
679 Environ Microbiol 78:6377–6379.  
680
- 681 Letarov A, Kulikov E. 2009. The bacteriophages in human- and animal body-associated  
682 microbial communities. J Appl Microbiol 107:1–13.  
683
- 684 Lim GE, Haygood MG. 2004. “*Candidatus* Endobugula glebosa,” a specific bacterial  
685 symbiont of the marine bryozoan *Bugula simplex*. Appl Environ Microbiol 70:4921–  
686 4929.  
687

- 688 Lim-Fong GE, Regali LA, Haygood MG. 2008. Evolutionary relationships of  
689 “*Candidatus Endobugula*” bacterial symbionts and their *Bugula* bryozoan hosts. *Appl*  
690 *Environ Microbiol* 74:3605–3609.  
691
- 692 Linnaeus, C. (1758). *Systema naturae per regna tria naturae, secundum classes,*  
693 *ordines, genera, species, cum characteribus, differentiis, synonymis, locis.* Vol. 1.  
694 Stockholm: Laurentii Salvii.  
695
- 696 Lohr JE, Chen F, Hill RT. 2005. Genomic Analysis of bacteriophage JL001: Insights into  
697 its interaction with a sponge-associated alpha-Proteobacterium. *Appl Environ Microbiol*  
698 71:1598–1609.  
699
- 700 Lohr J, Munn CB, Wilson WH. 2007. Characterization of a latent virus-Like infection of  
701 symbiotic zooxanthellae. *Appl Environ Microbiol* 73:2976–2981.  
702
- 703 López-Madrigal S, Duarte EH. 2019. Titer regulation in arthropod-*Wolbachia* symbioses.  
704 *FEMS Microbiol Lett* 366:fnz232.  
705
- 706 Lutaud G. 1965. Sur la présence de microorganismes spécifiques dans les glandes  
707 vestibulaires et dans l’aviculaire de *Palmicellaria skenei* (Ellis et Solander), Bryzoaire  
708 Chilostome. *Cah Biol Mar* 6:181–190.  
709
- 710 Lutaud G. 1969. La nature des corps funiculaires des cellularines, Bryzoaires  
711 Chilostomes. *Arch Zool Exp Gen* 110:2–30.  
712

- 713 Lutaud G. 1986. L'infestation du myoépithélium de l'oesophage par des  
714 microorganismes pigmentés et la structure des organes à bactéries du vestibule chez le  
715 Bryozoaire Chilostome *Palmicellaria skenei* (E. et S.) Can J Zool 64:1842–1851.  
716
- 717 Luter HM, Whalan S, Webster NS. 2010. Exploring the role of microorganisms in the  
718 disease-like syndrome affecting the sponge *Lanthella basta*. Appl Environ Microbiol 76:  
719 5736–5744.  
720
- 721 Mahmoud H, Jose L. 2017. Phage and nucleocytoplasmic large viral sequences  
722 dominate coral viromes from the Arabian Gulf. Front Microbiol 8:2063.  
723
- 724 Maltseva AL, Kotenko ON, Kutyumov VA, Matvienko DA, Shavarda AL, Winson MK,  
725 Ostrovsky AN. 2016. Novel brominated metabolites from Bryozoa: A functional analysis.  
726 Nat Prod Res 31:1840–1848.  
727
- 728 Mäntynen S, Sundberg L-R, Oksanen HM, Poranen MM. 2019. Half a century of  
729 research on membrane-containing bacteriophages: bringing new concepts to modern  
730 virology. Viruses 11:E76.  
731
- 732 Marhaver KL, Edwards RA, Rohwer F. 2008. Viral communities associated with healthy  
733 and bleaching corals. Environ Microbiol 10:2277–2286.  
734
- 735 Mathew M, Schwaha T, Ostrovsky AN, Lopanik NB. 2018. Symbiont-dependent sexual  
736 reproduction in marine colonial invertebrate: Morphological and molecular evidence.  
737 Mar Biol 165:14.  
738

- 739 McKinney FK, Jackson JDC. 1989. Bryozoan evolution. Boston, MA: Unwin Hyman.  
740
- 741 Middelboe M, Brussaard C. 2017. Marine viruses: Key players in marine ecosystems.  
742 Viruses 9: E302.  
743
- 744 Miller IJ, Vanee N, Fong SS, Lim-Fong, GE, Kwan JC. 2016a. Lack of overt genome  
745 reduction in the bryostatin-producing bryozoan symbiont “*Candidatus* Endobugula  
746 sertula”. Appl Environ Microbiol 82:6573–6583.  
747
- 748 Miller IJ, Weyna TR, Fong SS, Lim-Fong GE, & Kwan JC. 2016b. Single sample  
749 resolution of rare microbial dark matter in a marine invertebrate metagenome. Sci Rep  
750 6, 34362.  
751
- 752 Moosbrugger M, Schwaha T, Walzl MG, Obst M, Ostrovsky AN. 2012. The placental  
753 analogue and the pattern of sexual reproduction in the cheilostome bryozoan  
754 *Bicellariella ciliata* (Gymnolaemata). Front Zool 9:29.  
755
- 756 Moran NA, Degnan PH, Santos SR, Dunbar HE, Ochman H. 2005. The players in a  
757 mutualistic symbiosis: Insects, bacteria, viruses, and virulence genes. Proc Natl Acad  
758 Sci USA 102:16919–16926.  
759
- 760 Munn CB. 2006. Viruses as pathogens of marine organisms – from bacteria to whales.  
761 J Mar Biol Ass UK 86:453-467.  
762
- 763 Nielsen C. 2013. Bryozoa (Ectoprocta: ‘Moss’ animals), p. 1–6. *In*: eLS. Chichester:  
764 Wiley.

765

766 Nobiron I, Galloux M, Henry C, Torhy C, Boudinot P, Lejal N, Da Costa B, Delmas B.

767 2008. Genome and polypeptides characterization of Tellina virus 1 reveals a fifth

768 genetic cluster in the Birnaviridae family. *Virology* 371:350–361.

769

770 Ohmann B, Babiuk LA. 1986. Viral infections in domestic animals as models for studies

771 of viral immunology and pathogenesis. *J Gen Virol* 66:1–25.

772

773 Ostrovsky AN. 2013a. Evolution of sexual reproduction in marine invertebrates:

774 Example of gymnolaemate bryozoans. Dordrecht: Springer.

775

776 Ostrovsky AN. 2013b. From incipient to substantial: Evolution of placentotrophy in a

777 phylum of aquatic colonial invertebrates. *Evolution* 67:1368–1382.

778

779 Ostrovsky AN, Gordon DP, Lidgard S. 2009. Independent evolution of matrotrophy in

780 the major classes of Bryozoa: Transitions among reproductive patterns and their

781 ecological background. *Mar Ecol Prog Ser* 378:113–124.

782

783 Ostrovsky AN, Porter JS. 2011. Pattern of occurrence of supraneural coelomopores and

784 intertentacular organs in Gymnolaemata (Bryozoa) and its evolutionary implications.

785 *Zoomorphology* 130:1–15.

786

787 Pascelli C, Laffy PW, Kupresanin M, Ravasi T, Webster NS. 2018. Morphological

788 characterization of virus-like particles in coral reef sponges. *PeerJ* 6:e5625.

789

- 790 Patten NL, Harrison PL, Mitchell JG. 2008. Prevalence of virus-like particles within a  
791 staghorn scleractinian coral (*Acropora muricata*) from the Great Barrier Reef. Coral  
792 Reefs 27:569–580.
- 793
- 794 Perlmutter JI, Bordenstein SR, Unckless RL, LePage DP, Metcalf JA, Hill T, Martinez J,  
795 Jiggins FM, Bordenstein SR. 2019. The phage gene wmk is a candidate for male killing  
796 by a bacterial endosymbiont. PLoS Pathog 15:e1007936.
- 797
- 798 Pollock FJ, Wood-Charlson EM, van Oppen MJH, Bourne DG, Willis BL, Weynberg KD.  
799 2014. Abundance and morphology of virus-like particles associated with the coral  
800 *Acropora hyacinthus* differ between healthy and white syndrome-infected states. Mar  
801 Ecol Prog Ser 510:39–43.
- 802
- 803 van Oppen MH, Leong JA, Gates RD. 2009. Coral-virus interactions: A double-edged  
804 sword? Symbiosis 47:1–8.
- 805
- 806 Renault T, Novoa B. 2004. Viruses infecting bivalve molluscs. Aquat Living Resour  
807 17:397–409.
- 808
- 809 Reuter M. 1975. Viruslike particles in *Gyatrix hermaphroditus* (Turbellaria:  
810 Rhabdocoela). J Invertebr Pathol 25:79–95.
- 811
- 812 Richards GP, Chintapenta LK, Watson MA, Abbott AG, Ozbay G, Uknalis J, Oyelade  
813 AA, Parveen S. 2019. Bacteriophages Against Pathogenic Vibrios in Delaware Bay  
814 Oysters (*Crassostrea virginica*) During a Period of High Levels of Pathogenic *Vibrio*  
815 *parahaemolyticus*. Food Environ Virol 11:101–112.

816

817 Richardson KC, Jarrett L, Finke EH. 1960. Embedding in epoxy resins for ultrathin  
818 sectioning in electron microscopy. *Stain Technol* 35:313–323.

819

820 Rohwer F, Thurber RV. 2009. Viruses manipulate the marine environment. *Nature*  
821 459:207–212.

822

823 Roossinck MJ. 2011. The good viruses: viral mutualistic symbioses. *Nat Rev Microbiol*  
824 9:99–108.

825

826 Rosario K, Schenck RO, Harbeitner RC, Lawler SN, & Breitbart M. 2015. Novel circular  
827 single-stranded DNA viruses identified in marine invertebrates reveal high sequence  
828 diversity and consistent predicted intrinsic disorder patterns within putative structural  
829 proteins. *Front Microbiol* 6:696.

830

831 Ryland JS. 1970. *Bryozoans*. London: Hutchinson University Library.

832

833 Ryland JS. 2005. Bryozoa: An introductory overview, p. 9–20. *In* Woess E (ed)  
834 *Moostiere (Bryozoa)*. *Denisia*. vol 16. Linz: Biologiezentrum des Oberösterreichischen  
835 Landesmuseums.

836

837 Schwaha TF, Ostrovsky AN, Wanninger A. 2020. Key novelties in the evolution of  
838 Bryozoa: evidence from the soft-body morphology. *Biol Rev* DOI: [10.1111/brv.12583](https://doi.org/10.1111/brv.12583)

839

- 840 Sharp KH, Davidson SK, Haygood MG. 2007a. Localization of ‘*Candidatus*  
841 *Endobugula sertula*’ and the bryostatins throughout the life cycle of the bryozoan *Bugula*  
842 *neritina*. ISME J 1:693–702.
- 843
- 844 Sharp JH, Winson MK, Porter JS. 2007b. Bryozoan metabolites: an ecological  
845 perspective. Nat Prod Rep 24:659–673.
- 846
- 847 Shikuma NJ, Pilhofer M, Weiss GL, Hadfield MG, Jensen GJ. 2014. Marine tubeworm  
848 metamorphosis induced by arrays of bacterial phage tail–like structures. Science  
849 343:529–533.
- 850
- 851 Shkoporov AN, Hill C. 2019. Bacteriophages of the human gut: the "known unknown" of  
852 the microbiome. Cell Host Microbe 25:95–209.
- 853
- 854 Shunatova NN, Ostrovsky AN. 2001. Individual autozooidal behaviour and feeding in  
855 marine bryozoans. Sarsia 86:113–142.
- 856
- 857 Shunatova N, Ostrovsky A. 2002. Group autozooidal behaviour and chimneys in marine  
858 bryozoans. Mar Biol 140:503–518.
- 859
- 860 Suttle CA. 2005. Viruses in the sea. Nature 437:356–361.
- 861
- 862 Taylor NMI, van Raaij MJ, Leiman PG. 2018. Contractile injection systems of  
863 bacteriophages and related systems. Mol Microbiol 108:6–5.
- 864



- 865 Vacelet J, Gallissian M-F. 1978. Virus-like particles in the cells of the sponge  
866 *Verongia cavernicola* (Demospongiae, Dictyoceratida) and accompanying tissues  
867 changes. J Invertebr Pathol 31:246–254  
868
- 869 van Oppen MH, Leong J-A, Gates RD. 2009. Coral-virus interactions: A double-edged  
870 sword? Symbiosis 47:1–8.  
871
- 872 Vega Thurber RL, Correa AMS. 2011. Viruses of reef-building scleractinian corals. J  
873 Exp Mar Biol Ecol 408:102–113.  
874
- 875 Vijayan KK, Stalin Raj V, Balasubramanian CP, Alavandi SV, Thillai Sekhar V, Santiago  
876 TC. 2005. Polychaete worms – a vector for white spot syndrome virus (WSSV). Dis  
877 Aquat Org 63:107–111.  
878
- 879 Weinbauer MG. 2004. Ecology of prokaryotic viruses. FEMS Microbiol Rev 28:127–  
880 181.  
881
- 882 Weldon SR, Oliver KM. 2016. Diverse bacteriophage roles in an aphid-bacterial  
883 defensive mutualism, p. 173–206. *In* Hurst CJ (ed), *Advances in Environmental*  
884 *Microbiology*, vol 2. Springer International Publishing.  
885
- 886 Weynberg KD, Laffy PW, Wood-Charlson EM, Turaev D, Rattei T, Webster NS, van  
887 Oppen MJH. 2017. Coral-associated viral communities show high levels of diversity and  
888 host auxiliary functions. PeerJ 5:e4054.  
889

- 890 Winston JE. 1977. Feeding in marine bryozoans, p. 233–271. *In* Woollacott RM,  
891 Zimmer RL (ed), *Biology of Bryozoans*. London, New York: Academic Press.  
892
- 893 Winston JE. 1978. Polypide morphology and feeding behaviour in marine ectoprocts.  
894 *Bull Mar Sci* 28:1–31.  
895
- 896 Woolhouse M, Scott F, Hudson Z, Howey R, Chase-Topping M. 2012. Human viruses:  
897 discovery and emergence. *Phil Trans Roy Soc B Biol Sci* 367:2864–2871.  
898
- 899 Woollacott RM. 1981. Association of bacteria with bryozoan larvae. *Mar Biol* 65:155–  
900 158.  
901
- 902 Woollacott RM, Zimmer RL. 1975 A simplified placenta-like system for the transport of  
903 extraembryonic nutrients during embryogenesis of *Bugula neritina* (Bryozoa). *J Morphol*  
904 147:355–377.  
905
- 906 Zimmer RL, Woollacott RM. 1983. Mycoplasma-like organisms: occurrence with the  
907 larvae and adults of a marine bryozoan. *Science* 220:208–210.  
908
- 909 Zimmer RL, Woollacott RM. 1989. Larval morphology of the bryozoan *Watersipora*  
910 *arcuata* (Cheilostomata: Ascophora). *J Morphol* 199:125–150.  
911
